# Supplementary material
Source: Research Square preprint supplement (doi:10.21203/rs.3.rs-8923297/v1)
Supplement: Supplementary file 1 [file 33a33e408eab9c0111458fe0.docx]

| **Supplemental figure 1**  PRISMA flow diagram |
| --- |
| 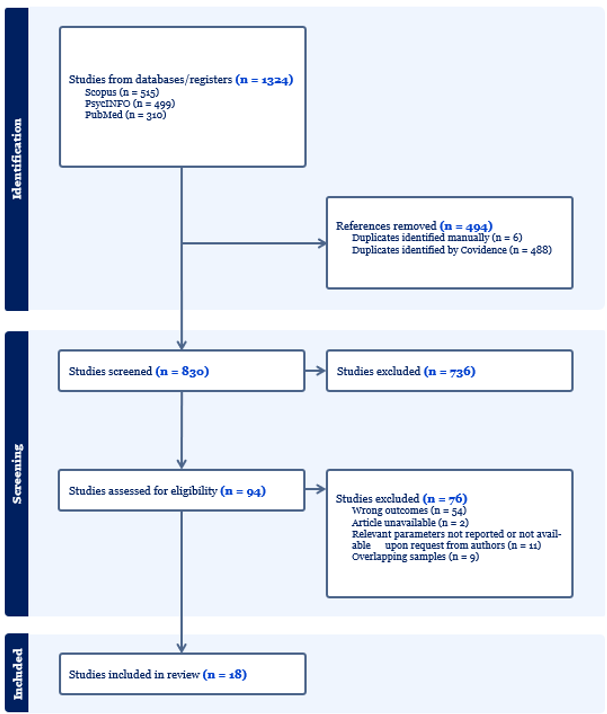 |
|  |

| **Supplemental table 1**  Study overview | | | | | | | | |
| --- | --- | --- | --- | --- | --- | --- | --- | --- |
| **Author (year)** | **Patient population** | **Therapist backgrounda** | **CBT therapists or novices** | **Rater backgrounda** | **Rating material** | **Interrater reliabilityc** | **Quality score (0-7)** | **Quality classificationb** |
| Goldberg et al. (2020) | Not reported | Master-level therapists (90.1%), PhD/PsyD (4%), MD (2.8%), bachelor-level therapists (3.1%) | CBT therapists | Doctoral-level CBT experts | Audio | *ICC* = .84 | 4 | Medium quality |
| Karlin et al. (2019) | Depression | Doctoral-level psychologists 66.7%, master's-level social workers 33.3% | Both | Expert CBT training consultant | Audio | Not reported | 3 | Low quality |
| Karlin et al. (2012) | Veterans with depression | Social workers (51%), psychologists (41%), nurses (5%), psychiatrists (3%) | Both | CBT experts | Audio | Not reported | 3 | Low quality |
| Crits-Cristoph et al. (2021) | Depression | Master's degree or above | CBT therapists | Graduate students in clinical psychology | Audio | *ICC* = .87 | 5 | High quality |
| Lopez et al. (2011) | Depression | Master's degree or above | CBT therapists | Clinical psychologists | Audio | *ICC* = .83 | 5 | High quality |
| Bryant et al. (1991) | Depression | Two doctoral-level clinical psychologists, two master's level psychiatric nurses | CBT therapists | Doctoral candidate in clinical psychology | Audio and video | Not reported | 4 | Medium quality |
| Rollinson et al. (2008) | Non-affective psychosis | Clinical psychologists and therapists | CBT therapists | Doctoral clinical psychologists | Audio | Not reported | 4 | Medium quality |
| Serfaty et al. (2009) | Depression in older adults | Accredited therapists | CBT therapists | Accredited therapists | Audio | Not reported | 3 | Low quality |
| Strunk et al. (2010) | Depression | Five licensed doctoral-level psychologists, one psychiatric nurse | CBT therapists | Doctoral-level researchers | Video | *ICC* = .77 | 6 | High quality |
| Westra et al. (2012) | General axienty disorder | Psychologists | CBT therapists | Four graduate students in clinical psychology | Video | *ICC* = .78 | 6 | High quality |
| Williams et al. (1991) | Not reported | Psychologists | Both | Doctoral-level researchers | Audio | *r* = .992 | 2 | Low quality |
| Yew et al. (2021) | Depression | Therapists | CBT therapists | Doctoral level psychology researcher-practitioners | Audio | *r* = 0.92 - 0.95 | 5 | High quality |
| Rozek et al. (2018) | Depression or anxiety | Trainee therapists | CBT novices | One doctoral student and two bachelor students. | Video | Not reported | 6 | High quality |
| Shah et al. (2013) | Low quality of life in older adults | Licensed clinical social workers | CBT therapists | Doctoral students | Audio | *r* = .92 | 5 | High quality |
| Rashkovic (2016)d | Patients in clinical practice | Psychologists (80%) Psychiatrists (8%) Psychiatrists/psychotherapists (12%) | CBT therapists | Doctoral-level researchers | Audio | *ICC* = .85 | 4 | Medium quality |
| Rashkovic (2016) | CBT therapists | 3 | Low quality |
| Rashkovic (2016) | CBT novices | 4 | Medium quality |
| McManus et al. (2010) | Anxiety or depression | Clinical psychologists (52.2%) Nurses (20.1%) Psychiatrists (11.9%) Counsellors (5.0%) Other (7.9%) | Both | Doctoral-level CBT experts | Audio or video | *ICC* = .47 | 2 | Low quality |
| Shaw et al. (1999) | Depression | Six psychologists, two psychiatrists | CBT therapists | Doctoral-level CBT experts | Audio | Not reported | 4 | Medium quality |
| *Notes. a)* Information on therapist and rater backgrounds is reported verbatim. *b*) Study quality was classified as low, medium, or high using quartiles, which defined the medium-quality category: low quality ≤ 3; medium quality = 4; high quality ≥ 5. *c*) If more than one interrater reliability score was reported in a record, the score for CBT therapists (i.e., therapists with CBT training or experience) is reported here. *d*) Each row for Rashkovic et al. (2016) represents distinct therapist groups reported in the record, with row one and two representing distinct experimental conditions, and row three representing the total sample before CBT training. | | | | | | | | |
